# Supplementary material
Source: publisher site journal article supplement (https://www.dovepress.com/article/566255)
Supplement: Supplementary file 1 [file 566255%20Supplementary%20Material.pdf]

# Primary Questionnaire for Oncologists

## Section 1: Eligibility

**1. Are you an oncologist working in a cancer care center in Saudi Arabia?**

- Yes, I am a medical oncologist
  - Yes, I am a radiation oncologist
  - No
  - Other (please specify): \_\_\_\_\_
- 

## Section 2: Center Characteristics

**2. In which geographical region is your cancer care center located?**

- Central Region
- Eastern Region
- Western Region
- Southern Region
- Northern Region

**3. What is the healthcare sector of your cancer care center?**

- Ministry of Health
- Other Governmental Organization (please specify): \_\_\_\_\_

**4. What patient population is served at your center?**

- Adults only
- Adults and pediatrics

**5. Does your center offer platinum-based chemotherapy and radiotherapy?**

- Yes, both chemotherapy and radiotherapy
  - Offers only chemotherapy
  - Offers only radiotherapy
  - Other (please specify): \_\_\_\_\_
-

Section 3: Audiology Services Availability and Location

**6. Are audiology services available in your facility?**

- Yes
- No
- Not sure / Don't know
- Other (please specify): \_\_\_\_\_

*If yes:*

**7. How far is the Audiology clinic from the cancer care center in your hospital?**

- In the same building and on the same floor
- In the same building but on a different floor
- In a different building
- Not sure / Don't know
- Other (please specify): \_\_\_\_\_

**Comments:** \_\_\_\_\_

---

Section 4: Ototoxicity Monitoring Programs, Policies, and Implementation Stage

**8. Is there an ototoxicity monitoring program in place for cancer patients receiving platinum-based chemotherapy or radiotherapy at your center?**

- Yes
- No
- Not sure / Don't know
- Other (please specify): \_\_\_\_\_

**9. Does your department or institution have any internal policies or clinical guidelines for ototoxicity monitoring?**

- Yes
- No
- Not sure
- Other (please specify): \_\_\_\_\_

*If yes:*

**10. What is the current stage of implementation of the program or the internal policy?**

- Planning stage
- Early implementation
- Well-established
- Not sure / Don't know
- Other (please specify): \_\_\_\_\_

**Comments:** \_\_\_\_\_

---

## Section 5: Real-World Practices in Ototoxicity Monitoring

### *Pre-treatment Counseling Practices*

**11. Are patients (or their caregivers) informed about potential ototoxic effects before starting chemotherapy or radiotherapy?**

- Always
- Usually
- Sometimes
- Rarely
- Never
- Not sure / Don't know
- Other (please specify): \_\_\_\_\_

*If yes:*

**12. Who conducts the pre-treatment counseling?**

- Oncologists only
- Oncologists and audiologists
- Other (please specify): \_\_\_\_\_

**Comments:** \_\_\_\_\_

**13. Are patients (or their caregivers) provided information about rehabilitative options such as hearing aids or communication strategies before starting chemotherapy or radiotherapy?**

- Always
- Usually
- Sometimes
- Rarely
- Never
- Not sure / Don't know
- Other (please specify): \_\_\_\_\_

**14. How is the information typically provided?**

- Verbally only
- Verbally and in written format (e.g., handouts)
- Other (please specify): \_\_\_\_\_

**Comments:** \_\_\_\_\_

---

*Referral to Audiological Evaluation*

**15. Is ototoxicity monitoring (referring to Audiology for hearing evaluation) a routine practice for patients receiving platinum-based chemotherapy and/or radiotherapy?**

**For pediatric patients**

- Always
- Usually
- Sometimes (intended for all, but inconsistently applied)
- Rarely
- Never
- Referral to Audiology only occurs when symptoms are present or a patient complains
- Referral to Audiology only occurs for certain patients (please specify): \_\_\_\_\_
- Only for patients receiving radiotherapy
- Only for patients receiving cisplatin
- Other (please specify): \_\_\_\_\_

**Comments:** \_\_\_\_\_

**For adult patients**

- Always
- Usually
- Sometimes (intended for all, but inconsistently applied)
- Rarely
- Never
- Referral to Audiology only occurs when symptoms are present or a patient complains
- Referral to Audiology only occurs for certain patients (please specify): \_\_\_\_\_
- Only for patients receiving radiotherapy
- Only for patients receiving cisplatin
- Other (please specify): \_\_\_\_\_

**Comments:** \_\_\_\_\_

*If any level of ototoxicity monitoring was reported in Question 15, please proceed to answer Questions 16–23 before moving to Section 6.  
If not, please skip directly to Section 6.*

---

**16. Is a baseline audiological evaluation conducted around the first treatment for patients (either before or soon after)?**

**For pediatric patients**

- Always
- Usually
- Sometimes
- Rarely
- Never
- Other (please specify): \_\_\_\_\_

**Comments:** \_\_\_\_\_

**For adult patients**

- Always
- Usually
- Sometimes
- Rarely
- Never
- Other (please specify): \_\_\_\_\_

**Comments:** \_\_\_\_\_

**17. Is monitoring maintained consistently throughout patient treatment?**

**For pediatric patients**

- Always
- Usually
- Sometimes
- Rarely
- Never
- Monitoring tests are undertaken infrequently
- Other (please specify): \_\_\_\_\_

**Comments:** \_\_\_\_\_

**For adult patients**

- Always
- Usually

Supplementary material: two versions of the questionnaire

- Sometimes
- Rarely
- Never
- Monitoring tests are undertaken infrequently
- Other (please specify): \_\_\_\_\_

**Comments:** \_\_\_\_\_

**18. Are post-treatment hearing assessments conducted for patients?**

**For pediatric patients**

- Always
- Usually
- Sometimes
- Rarely
- Never
- Only when symptoms are present or rehabilitation is necessary
- Other (please specify): \_\_\_\_\_

**Comments:** \_\_\_\_\_

**For adult patients**

- Always
- Usually
- Sometimes
- Rarely
- Never
- Only when symptoms are present or rehabilitation is necessary
- Other (please specify): \_\_\_\_\_

**Comments:** \_\_\_\_\_

**19. Are patients provided with long-term follow-up Audiology appointments?**

- No
- Yes up to 12 months after treatment
- Yes up to 24 months after treatment
- Only if the patient is referred for further rehabilitative intervention
- Not sure
- Other (please specify): \_\_\_\_\_

**Comments:** \_\_\_\_\_

**20. Is there a tracking or follow-up system in place to ensure continued follow-up?**

- No
- Yes
- Not sure
- Other (please specify): \_\_\_\_\_

**Comments:** \_\_\_\_\_

---

*Location*

**21. Where are patients tested?**

- Patients are tested at the Audiology department only
- Patients considered behaviorally responsive are sent to the Audiology department; patients with limited responsiveness are tested at the Oncology treatment unit
- Unsure / Don't know
- Other (please specify): \_\_\_\_\_

**Comments:** \_\_\_\_\_

---

*Access and Scheduling*

**22. Who has access to patients who should undergo ototoxicity monitoring?**

- Oncology clinics only
- Audiologist as well
- Multidisciplinary clinics
- Other (please specify): \_\_\_\_\_

**23. Who is responsible for scheduling ototoxicity monitoring tests for patients?**

- Audiology clinic is responsible
- Audiology, shared with Oncology
- Other (please specify): \_\_\_\_\_

**Comments:** \_\_\_\_\_

---

*Section 6: Challenges and Barriers*

**21. In your opinion, what are the most prominent challenges currently affecting ototoxicity monitoring practices?**

*(Select all that apply)*

Supplementary material: two versions of the questionnaire

- Unavailability of audiology services
  - Shortage of audiologists
  - Compromised status of cancer patients
  - High patient load
  - Ineffective referral system
  - Patient time and scheduling constraints
  - Inconvenient audiology clinic locations
  - Lack of multidisciplinary teamwork / insufficient collaboration
  - Absence of care coordinators
  - Other (please specify): \_\_\_\_\_
- Comments:** \_\_\_\_\_
- 

Section 9: Oncologists' Perspectives

**Please indicate your level of agreement or disagreement with the below statements.**

**22. A national ototoxicity monitoring program involving a multidisciplinary team (oncologists, audiologists, and pharmacists) would improve current practices.**

- Strongly disagree
- Disagree
- Neither agree nor disagree
- Agree
- Strongly agree
- Other (please specify): \_\_\_\_\_

**24. The initiative for establishing a national ototoxicity monitoring program should be led by audiologists as part of a multidisciplinary collaboration.**

- Strongly disagree
  - Disagree
  - Neither agree nor disagree
  - Agree
  - Strongly agree
  - Other (please specify): \_\_\_\_\_
- Comments:** \_\_\_\_\_

**25. Audiologists should raise awareness among healthcare providers, patients, and caregivers about ototoxic symptoms (e.g., hearing loss, tinnitus, imbalance) and available rehabilitation options.**

- Strongly disagree
- Disagree
- Neither agree nor disagree
- Agree
- Strongly agree
- Other (please specify): \_\_\_\_\_

**Comments:** \_\_\_\_\_

**26. Audiologists should participate in pre-treatment counseling to discuss the potential risk of ototoxicity and provide information about its effects and rehabilitation options.**

- Strongly disagree
- Disagree
- Neither agree nor disagree
- Agree
- Strongly agree
- Other (please specify): \_\_\_\_\_

**Comments:** \_\_\_\_\_

---

# Parallel Questionnaire for Audiologists

## Section 1: Eligibility

**1. Are you an audiologist working in a facility that hosts a cancer care center in Saudi Arabia?**

- Yes
- No
- Other (please specify): \_\_\_\_\_

*Note: The name and characteristics of the cancer center will be cross-checked with the responses from the oncologist version of the questionnaire to confirm eligibility as the designated audiology representative for the same center.*

---

## Section 2: Audiology Services Location

**2. How far is the audiology clinic from the cancer care center in your hospital?**

- In the same building and on the same floor
- In the same building but on a different floor
- In a different building
- Not sure / Don't know
- Other (please specify): \_\_\_\_\_

**Comments:** \_\_\_\_\_

---

## Section 3: Ototoxicity Monitoring Programs, Policies, and Implementation Stage

**3. Is there an ototoxicity monitoring program in place for cancer patients receiving platinum-based chemotherapy or radiotherapy at your center?**

- Yes
- No
- Not sure / Don't know
- Other (please specify): \_\_\_\_\_

**4. Does your department or institution have any internal policies or clinical guidelines for ototoxicity monitoring?**

- Yes
- No

Supplementary material: two versions of the questionnaire

- Not sure
- Other (please specify): \_\_\_\_\_

*If yes:*

**5. What is the current stage of implementation of the program or the internal policy?**

- Planning stage
- Early implementation
- Well-established
- Not sure / Don't know
- Other (please specify): \_\_\_\_\_

**Comments:** \_\_\_\_\_

---

Section 4: Real-World Practices in Ototoxicity Monitoring

*Pre-treatment Counseling Practices*

**6. Are you, as an audiologist, involved in pre-treatment counseling for cancer patients?**

- Yes
- No
- Other (please specify): \_\_\_\_\_

**Comments:** \_\_\_\_\_

**7. Do you have written materials available that provide information about ototoxicity symptoms and rehabilitative options to support counseling?**

- Yes
- No
- Other (please specify): \_\_\_\_\_

**Comments:** \_\_\_\_\_

---

*Referral to Audiological Evaluation*

**8. Is ototoxicity monitoring (referring to Audiology for hearing evaluation) a routine practice for patients receiving platinum-based chemotherapy and/or radiotherapy?**

**For pediatric patients**

- Always
- Usually
- Sometimes (intended for all, but inconsistently applied)
- Rarely

Supplementary material: two versions of the questionnaire

- Never
  - Referral to Audiology only occurs when symptoms are present or a patient complains
  - Referral to Audiology only occurs for certain patients (please specify): \_\_\_\_\_
  - Only for patients receiving radiotherapy
  - Only for patients receiving cisplatin
  - Unsure; referral decisions depend on oncologists
  - Other (please specify): \_\_\_\_\_
- Comments:** \_\_\_\_\_

**For adult patients**

- Always
- Usually
- Sometimes (intended for all, but inconsistently applied)
- Rarely
- Never
- Referral to Audiology only occurs when symptoms are present or a patient complains
- Referral to Audiology only occurs for certain patients (please specify): \_\_\_\_\_
- Only for patients receiving radiotherapy
- Only for patients receiving cisplatin
- Unsure; referral decisions depend on oncologists
- Other (please specify): \_\_\_\_\_

**Comments:** \_\_\_\_\_

*If any level of ototoxicity monitoring was reported in Question 8, please proceed to answer Questions 9–24 before moving to Section 5.  
If not, please skip directly to Section 5.*

---

**9. Is a baseline audiological evaluation conducted around the first treatment for patients (either before or soon after)?**

**For pediatric patients**

- Always
- Usually
- Sometimes
- Rarely
- Never

Supplementary material: two versions of the questionnaire

Other (please specify): \_\_\_\_\_

**Comments:** \_\_\_\_\_

**For adult patients**

Always

Usually

Sometimes

Rarely

Never

Other (please specify): \_\_\_\_\_

**Comments:** \_\_\_\_\_

**10. Is monitoring maintained consistently throughout patient treatment?**

**For pediatric patients**

Always

Usually

Sometimes

Rarely

Never

Monitoring tests are undertaken infrequently

Other (please specify): \_\_\_\_\_

**Comments:** \_\_\_\_\_

**For adult patients**

Always

Usually

Sometimes

Rarely

Never

Monitoring tests are undertaken infrequently

Other (please specify): \_\_\_\_\_

**Comments:** \_\_\_\_\_

**11. Are post-treatment hearing assessments conducted for patients?**

**For pediatric patients**

Supplementary material: two versions of the questionnaire

- Always
  - Usually
  - Sometimes
  - Rarely
  - Never
  - Only when symptoms are present or rehabilitation is necessary
  - Other (please specify): \_\_\_\_\_
- Comments:** \_\_\_\_\_

**For adult patients**

- Always
  - Usually
  - Sometimes
  - Rarely
  - Never
  - Only when symptoms are present or rehabilitation is necessary
  - Other (please specify): \_\_\_\_\_
- Comments:** \_\_\_\_\_

**12. Are patients provided with long-term follow-up Audiology appointments?**

- No
  - Yes up to 12 months after treatment
  - Yes up to 24 months after treatment
  - Only if the patient is referred for further rehabilitative intervention
  - Not sure
  - Other (please specify): \_\_\_\_\_
- Comments:** \_\_\_\_\_

**13. Is there a tracking or follow-up system in place to ensure continued follow-up?**

- No
  - Yes
  - Not sure
  - Other (please specify): \_\_\_\_\_
- Comments:** \_\_\_\_\_
-

*Location*

**14. Where are patients tested?**

- Patients are tested at the Audiology department only
- Patients considered behaviorally responsive are sent to the Audiology department, while patients with limited responsiveness are tested at the Oncology treatment unit
- Other (please specify): \_\_\_\_\_

**Comments:** \_\_\_\_\_

---

*Access and Scheduling*

**15. Who has access to patients who should undergo ototoxicity monitoring?**

- Oncology clinics only
- Oncology and Audiology
- Multidisciplinary clinics
- Other (please specify): \_\_\_\_\_

**16. Who is responsible for scheduling ototoxicity monitoring tests for patients?**

- The Audiology clinic
- Audiology with Oncology
- Other (please specify): \_\_\_\_\_

**Comments:** \_\_\_\_\_

---

*Protocols and Testing*

**17. What tests do you include in the baseline assessment?**

*(Select all that apply)*

- Standard air-conduction pure-tone audiometry (PTA) up to 8 kHz
- Extended high-frequency (EHF) PTA up to 12 kHz
- EHF PTA up to 16 kHz
- EHF PTA up to 20 kHz
- Sensitive range for ototoxicity (SRO)
- Bone-conduction PTA
- Distortion-product otoacoustic emissions (DPOAEs) up to 10 kHz
- DPOAEs up to 8 kHz
- Transient-evoked otoacoustic emissions (TEOAEs)
- Auditory brainstem response (ABR)

Supplementary material: two versions of the questionnaire

- Tympanometry
- Acoustic reflexes
- Speech reception thresholds (SRT)
- Word recognition testing
- Self-report measures for hearing, tinnitus, or quality of life
- Other (please specify): \_\_\_\_\_

**Comments:** \_\_\_\_\_

**18. What tests do you include in monitoring assessments?**

- Same test list as baseline
- Same as baseline preferred, but sometimes abbreviated due to schedule or tolerance
- Shortened screening only, then comprehensive testing if changes are detected
- Shortened screening only unless rehabilitation is a focus
- Other (please specify): \_\_\_\_\_

**Comments:** \_\_\_\_\_

**19. Do you monitor for ototoxicity-related tinnitus or balance disorders?**

- No
- Yes for both
- Yes, but only for tinnitus
- Yes, but only for balance disorders
- Other (please specify): \_\_\_\_\_

**Comments:** \_\_\_\_\_

**20. What tests do you include in post-treatment evaluations?**

- Same test list as baseline
- Shortened screening only, then comprehensive testing if changes are detected
- Shortened screening only unless rehabilitation is a focus
- Other (please specify): \_\_\_\_\_

**Comments:** \_\_\_\_\_

**21. Is there a standard definition for an ototoxic hearing shift used in your clinic?**

- No
- Yes (please specify): \_\_\_\_\_
- Unsure / Don't know
- Other (please specify): \_\_\_\_\_

**Comments:** \_\_\_\_\_

**22. Do you use a validated grading scale in your clinic?**

- No
- Yes, the International Society of Pediatric Oncology Boston Ototoxicity Scale (SIOP Boston)
- Yes, the Common Terminology Criteria for Adverse Events (CTCAE)
- Other (please specify): \_\_\_\_\_
- Unsure / Don't know

**Comments:** \_\_\_\_\_

**23. Is there a unified plan of action when a shift is detected?**

- No clear action plan
- Yes (please specify): \_\_\_\_\_
- Not sure
- Other (please specify): \_\_\_\_\_

**Comments:** \_\_\_\_\_

**24. Which of the following is usually done if changes in hearing occur?**

*(Select all that apply)*

- Conduct a validating retest within 24–48 hours
- Provide follow-up appointments
- Counsel on rehabilitative options (e.g., hearing aids, communication strategies)
- Report findings in audiology notes for oncologist review
- Other (please specify): \_\_\_\_\_

**Comments:** \_\_\_\_\_

---

Section 5: Equipment Availability

**25. Is the essential equipment for comprehensive ototoxicity monitoring available in your clinic (e.g., extended high-frequency audiometer, diagnostic DPOAE systems)?**

- Yes
- No
- Unsure / Don't know
- Other (please specify): \_\_\_\_\_

**26. Is portable equipment available for bedside testing to support comprehensive ototoxicity monitoring when needed?**

- Yes
- No

Supplementary material: two versions of the questionnaire

- Unsure / Don't know
- Other (please specify): \_\_\_\_\_

**27. What barriers exist to testing patients at the Oncology treatment unit, when necessary?**

*(Select all that apply)*

- Equipment limitations
- Environmental noise
- Audiologist availability
- Other (please specify): \_\_\_\_\_

**Comments:** \_\_\_\_\_

---

Section 6: Challenges and Facilitators

**28. In your opinion, what are the most prominent challenges currently affecting ototoxicity monitoring practices?**

*(Select all that apply)*

- High audiology workload and patient load
- Staff shortages (e.g., insufficient number of audiologists)
- Equipment limitations
- Lack of ototoxicity monitoring guidelines or internal policies
- Lack of clarity regarding test frequency, time-efficient protocols, grading scales, reporting standards, or defining actionable ototoxic changes
- Inefficient or unclear referral system
- Lack of multidisciplinary teamwork/poor coordination between departments
- Limited collaboration with Oncology or pharmacy
- Patient scheduling constraints/limited appointment availability
- Compromised status of cancer patients
- Inconvenient location of audiology services within or outside the hospital
- Other (please specify): \_\_\_\_\_

**Comments:** \_\_\_\_\_

---
